# Supplementary material for: Large-scale transcriptome comparison of sunflower genes responsive to Verticillium dahliae
Source: BMC Genomics. 2017 Jan 6;18:42. doi: 10.1186/s12864-016-3386-7 (PMC5219742; doi:10.1186/s12864-016-3386-7)
Supplement: Additional file 10: Table S11. — DEGs directly involved in SVW resistance in genotype-specific pattern. (XLSX 59 kb) [file 12864_2016_3386_MOESM10_ESM.xlsx]

## Sheet: S18
DEGs directly involved in SVW resistance in Genotype-specific transcriptional pattern in S18 (R Genotype)
Differentially expressed genes directly involved in SVW resistance in Genotype-specific in S18(R Genotype) transcriptional pattern showing statistically significant differential expression. The relative expression values, calculated as the logarithm of fold changes (logFCs), in SVW inoculated SI8 and P77 plants at different time points are reported. The logarithm of fold changes (logFCs) derived …
NO.	GeneID	log2 Ratio(S6h/SCk)	log2 Ratio(S12h/SCk)	log2 Ratio(S24h/SCk)	log2 Ratio(S2d/SCk)	log2 Ratio(S3d/SCk)	log2 Ratio(S5d/SCk)	log2 Ratio(S10d/SCk)	log2 Ratio(P6h/PCk)	log2 Ratio(P12h/PCk)	log2 Ratio(P24h/PCk)	log2 Ratio(P2d/PCk)	log2 Ratio(P3d/PCk)	log2 Ratio(P5d/PCk)	log2 Ratio(P10d/PCk)	Average logFCs-S18	Average logFCs-P77	Seq. Description	Enzyme Codes	Blast nr
1	CL4346.Contig1_All	2.98799	2.03014	4.01885	4.42539	2.95534	3.73333	4.48547	0.197456	0.437137	3.73002	3.13312	2.82441	3.21248	2.59059	3.5195	2.3036	peroxidase	[EC:1.11.1.7]	gi|225439922|ref|XP_002275288.1|/1.90551e-140/PREDICTED: peroxidase 21 [Vitis vinifera]
2	Unigene23765_All	3.95156	2.98508	2.12355	2.35428	2.59919	2.22015	3.45663	0.435644	0.410716	0.764225	0.399548	0.695187	-0.130641	-0.0776387	2.81292	0.35672	peroxidase	[EC:1.11.1.7]	gi|269856432|gb|ACZ51443.1|/2.43966e-115/peroxidase protein [Mikania micrantha]
3	Unigene19013_All	2.88191	1.65848	1.44548	2.92013	2.27649	1.2345	4.11307	0.651641	0.348195	1.21267	1.73479	1.17358	0.941962	0.947896	2.36144	1.00153	peroxidase	[EC:1.11.1.7]	gi|5381253|dbj|BAA82306.1|/2.45949e-141/peroxidase [Nicotiana tabacum]
4	CL2024.Contig2_All	0.927714	1.21456	2.25284	0.806791	2.54857	2.55357	2.02779	-0.685662	-0.00432168	1.51911	-0.0329769	0.658661	1.29904	0.591388	1.76169	0.477892	peroxidase	[EC:1.11.1.7]	gi|224073200|ref|XP_002304020.1|/8.82575e-122/predicted protein [Populus trichocarpa]
5	Unigene8989_All	0.954657	1.02401	1.4828	1.46172	0.503818	1.21016	1.02191	-0.422628	0.351106	1.38325	0.950508	0.742991	0.78551	0.415813	1.09415	0.600935	peroxidase	[EC:1.11.1.7]	gi|470108362|ref|XP_004290489.1|/3.08543e-128/PREDICTED: peroxidase 12-like [Fragaria vesca subsp. vesca]
6	Unigene55335_All	1.02082	-0.104224	-1.04637	1.19277	1.73228	1.40135	0.260516	0.173325	0.460939	0.153368	-0.102284	0.27459	-0.0664125	0.406202	0.636734	0.185675	peroxidase	[EC:1.11.1.7]	gi|462410642|gb|EMJ15976.1|/7.2671e-96/hypothetical protein PRUPE_ppa023679mg [Prunus persica]
7	CL11644.Contig1_All	1.78913	-0.155761	1.24462	-1.16097	0.236392	-1.11296	-0.341337	2.09412	0.49869	0.490734	-0.631944	-0.217606	-1.18947	-0.552838	0.0713015	0.0702405	peroxidase	[EC:1.11.1.7]	gi|269856432|gb|ACZ51443.1|/2.37258e-141/peroxidase protein [Mikania micrantha]
8	CL6791.Contig5_All	-0.798927	-1.25361	-1.28601	-0.15778	0.349752	0.202706	-1.34234	-0.422628	-0.124616	-0.624508	-0.142601	0.354107	-0.0202644	0.0763482	-0.612315	-0.129166	peroxidase	[EC:1.11.1.7]	gi|225459726|ref|XP_002285892.1|/2.76189e-75/PREDICTED: peroxidase 64-like isoform 1 [Vitis vinifera]
9	Unigene15614_All	0.0809565	-0.31302	-0.299542	-0.226521	-1.55315	-1.54206	-0.728425	-0.582163	0.100835	0.496815	0.768442	-0.356002	-0.354002	0.198208	-0.654537	0.0388763	peroxidase	[EC:1.11.1.7]	gi|310892577|gb|ADP37429.1|/2.16225e-166/alkaline leaf peroxidase [Cynara cardunculus var. scolymus]
10	Unigene27052_All	-1.07229	-1.20993	-2.00198	-0.230683	-0.115829	-0.227313	-0.734053	-1.29282	-0.662705	-1.36592	-0.532168	-0.335421	-0.679098	-1.03938	-0.798868	-0.843931	peroxidase	[EC:1.11.1.7]	gi|62122339|dbj|BAD93164.1|/1.10096e-167/cationic peroxidase [Zinnia elegans]
11	Unigene33089_All	-0.280832	-2.86385	-1.48889	-0.651943	-0.0325116	-0.0641683	-0.212946	0.069031	-0.803829	-1.30454	-0.432108	-0.437707	-0.702866	-0.57404	-0.799306	-0.598008	peroxidase	[EC:1.11.1.7]	gi|470111204|ref|XP_004291839.1|/2.39321e-51/PREDICTED: peroxidase 9-like [Fragaria vesca subsp. vesca]
12	Unigene29237_All	-0.81838	-1.60358	-1.60713	-0.977965	0.116328	0.00854856	-0.947072	-0.229105	-0.973071	-0.65292	-0.717072	-0.672715	-1.55106	-0.692016	-0.832749	-0.783994	peroxidase	[EC:1.11.1.7]	gi|357483585|ref|XP_003612079.1|/3.40587e-104/Peroxidase [Medicago truncatula]
13	Unigene15957_All	-0.594727	-2.24269	-1.492	-0.661202	-0.151872	-0.0444232	-0.698668	0.222079	-0.481093	-0.844553	-0.356931	-0.460225	-0.820949	-0.80671	-0.840798	-0.506911	peroxidase	[EC:1.11.1.7]	gi|224062081|ref|XP_002300745.1|/1.98446e-90/predicted protein [Populus trichocarpa]
14	CL4346.Contig2_All	-1.05753	-1.63409	0.160882	-1.18611	-0.177545	-0.951628	-2.06194	0.553965	0.142383	0.229368	-1.08793	-0.586582	-0.745846	-1.15438	-0.986851	-0.378431	peroxidase	[EC:1.11.1.7]	gi|225626263|gb|ACN97181.1|/8.68554e-141/peroxidase [Populus trichocarpa]
15	Unigene11976_All	-0.401003	-1.56321	-1.50263	-0.999001	-0.708095	-0.690815	-1.19791	0.510258	0.0969617	-0.148621	0.120433	-0.217659	0.0610666	-0.915077	-1.00895	-0.0703768	peroxidase	[EC:1.11.1.7]	gi|356553351|ref|XP_003545020.1|/3.273e-21/PREDICTED: peroxidase 64-like [Glycine max]
16	CL5715.Contig1_All	-0.0787119	-1.01425	-0.550678	-1.07807	-1.13005	-1.60814	-2.23851	-0.178702	0.332713	0.581848	1.26768	1.04568	0.646966	0.255785	-1.09977	0.564568	peroxidase	[EC:1.11.1.7]	gi|460407226|ref|XP_004249055.1|/2.37147e-47/PREDICTED: cationic peroxidase 1-like [Solanum lycopersicum]
17	CL6791.Contig2_All	-0.979176	-2.47697	-1.73206	-1.14158	-0.230591	-0.491729	-1.29609	0.0424252	-0.666549	-1.45883	-0.736442	-0.470154	-0.785456	-0.915405	-1.1926	-0.712916	peroxidase	[EC:1.11.1.7]	gi|359492099|ref|XP_003634364.1|/2.4934e-110/PREDICTED: peroxidase 64-like isoform 2 [Vitis vinifera]
18	CL5397.Contig3_All	-0.889826	-1.03148	-0.250754	-1.63834	-0.925786	-1.19999	-2.65538	-0.944137	-0.445835	-0.356316	-1.12684	-0.627841	-0.854804	-1.69838	-1.22736	-0.864879	peroxidase	[EC:1.11.1.7]	gi|224093204|ref|XP_002309832.1|/2.17659e-131/predicted protein [Populus trichocarpa]
19	Unigene28206_All	-1.13964	-0.728508	-0.664944	-0.893648	-3.18479	-3.34971	-3.18361	-0.93359	0.271313	-0.272301	1.25333	0.206149	-1.16039	-0.0490696	-1.87784	-0.0977943	peroxidase	[EC:1.11.1.7]	gi|255581005|ref|XP_002531320.1|/8.89524e-23/Cationic peroxidase 1 precursor, putative [Ricinus communis]
20	CL7371.Contig2_All	-1.69633	-1.90653	-1.3041	-2.95476	-1.92582	-2.10489	-4.11228	0.683392	0.133688	-0.775837	-1.80186	-1.35123	-2.04663	-2.38185	-2.28639	-1.07719	peroxidase	[EC:1.11.1.7]	gi|224142233|ref|XP_002324463.1|/1.04606e-73/predicted protein [Populus trichocarpa]
21	Unigene13541_All	-1.55755	-1.97668	-0.888604	-3.15207	-2.23154	-2.11128	-4.12221	0.457858	-0.0631753	-0.386257	-1.52188	-1.07176	-1.74307	-1.77143	-2.29142	-0.871388	peroxidase	[EC:1.11.1.7]	gi|224142233|ref|XP_002324463.1|/2.65997e-60/predicted protein [Populus trichocarpa]
22	Unigene66314_All	-2.3271	-2.09529	-1.6838	-4.701	-4.06614	-5.23107	-3.74304	-2.00759	-0.32625	-0.139851	-1.87957	-2.53082	-1.23439	-4.21053	-3.40678	-1.76129	peroxidase	[EC:1.11.1.7]	gi|359485668|ref|XP_002274157.2|/3.46065e-30/PREDICTED: peroxidase 27-like [Vitis vinifera]
1	CL9898.Contig2_All	-0.814449	-1.29533	-1.75174	0.428771	0.910318	0.453214	0.16905	-0.625791	-0.64856	-0.198065	1.0569	0.902822	0.573402	0.543902	-0.271451	0.229231	L-ascorbate oxidase	[EC:1.10.3.3]	gi|460393811|ref|XP_004242502.1|/0/PREDICTED: laccase-3-like [Solanum lycopersicum]
2	CL7892.Contig1_All	0.341316	-1.04417	0.096382	-1.38483	-0.87092	-1.50112	-1.40087	2.81391	0.859032	1.42728	-0.163335	0.0938132	-0.18548	-0.44722	-0.823458	0.628285	L-ascorbate oxidase	[EC:1.10.3.3]	gi|350538127|ref|NP_001233816.1|/0/laccase precursor [Solanum lycopersicum]
3	CL4003.Contig2_All	-0.816836	-0.207035	-1.03025	-1.87113	-1.34909	-1.09209	-1.8556	0.316539	0.167804	-1.16728	-1.65246	-0.657349	-1.08294	-1.50249	-1.17458	-0.796881	L-ascorbate oxidase	[EC:1.10.3.3]	gi|350537917|ref|NP_001234829.1|/0/ascorbate oxidase precursor [Solanum lycopersicum]
4	CL7892.Contig3_All	-1.18957	-1.29296	-1.00225	-2.08328	-1.17683	-1.19831	-2.37359	-0.7109	-0.0423451	-0.95487	-1.20654	-0.500559	-0.920825	-1.37487	-1.47383	-0.815844	L-ascorbate oxidase	[EC:1.10.3.3]	gi|350538127|ref|NP_001233816.1|/2.88897e-45/laccase precursor [Solanum lycopersicum]
5	CL7892.Contig4_All	-1.37777	-1.38984	-1.25226	-1.80665	-1.19993	-1.40554	-2.28132	-0.849421	0.187266	-0.539504	-0.958437	-0.312705	-0.624493	-1.06113	-1.53047	-0.594061	L-ascorbate oxidase	[EC:1.10.3.3]	gi|28804501|dbj|BAC57956.1|/1.61957e-160/laccase [Aster tripolium]
6	CL10061.Contig1_All	-0.788179	-1.8148	-0.532294	-2.31088	-1.22622	-0.797618	-3.57297	1.77508	0.61088	-0.582493	-1.70839	-0.0291682	-0.701835	-1.04652	-1.57757	-0.240348	L-ascorbate oxidase	[EC:1.10.3.3]	gi|255575031|ref|XP_002528421.1|/0/multicopper oxidase, putative [Ricinus communis]
7	Unigene23129_All	-0.77059	-3.04282	-0.280838	-2.21558	-1.58072	-0.667636	-3.42754	2.08525	0.863888	-1.24266	-3.31253	0.438322	-1.43031	-0.617957	-1.71225	-0.459428	L-ascorbate oxidase	[EC:1.10.3.3]	gi|224080706|ref|XP_002306213.1|/4.46107e-54/predicted protein [Populus trichocarpa]
1	Unigene7849_All	1.02082	0.127102	3.58298	5.56578	4.82868	4.27673	5.49727	-	-0.00432168	2.54821	2.02732	2.97874	2.40947	2.57083	3.55705	2.29818	aquaporin PIP	-	gi|42572785|ref|NP_974489.1|/3.3172e-25/putative aquaporin PIP1-4 [Arabidopsis thaliana]
2	Unigene27629_All	0.857325	0.641675	1.24693	2.10635	2.06314	2.40556	2.66295	-0.387321	-0.202548	0.948376	0.919408	0.345424	0.960235	0.913169	1.71199	0.499535	aquaporin PIP	-	gi|170791079|gb|ACB38232.1|/5.646e-158/aquaporin [Gerbera hybrid cultivar]
3	Unigene3096_All	0.943345	1.20063	1.26277	0.931113	1.61568	1.70907	0.820388	-0.429481	1.39352	1.42753	0.311225	0.948574	0.758757	1.27599	1.21186	0.812303	aquaporin PIP	-	gi|82659447|gb|ABB88840.1|/4.0779e-31/aquaporin [Stevia rebaudiana]
4	Unigene26855_All	0.189956	-0.321284	0.762874	1.64644	1.70246	1.47438	1.88012	-0.813158	-0.0996514	0.447251	0.86816	0.680944	0.752929	1.08696	1.04785	0.417633	aquaporin PIP	-	gi|170791079|gb|ACB38232.1|/4.54072e-157/aquaporin [Gerbera hybrid cultivar]
5	Unigene56364_All	0.151527	-0.321488	0.757424	1.30907	1.85765	1.43598	1.51376	-1.01774	-0.00432168	0.14105	0.819835	1.09039	0.841927	1.6896	0.957703	0.508678	aquaporin PIP	-	gi|170791079|gb|ACB38232.1|/5.1902e-158/aquaporin [Gerbera hybrid cultivar]
6	CL307.Contig8_All	-0.468951	-0.498957	0.399312	1.17557	1.73323	1.47593	2.10905	-1.67775	-0.301942	0.637356	0.169343	0.504086	0.785925	0.202881	0.846454	0.0456994	aquaporin PIP	-	gi|255578852|ref|XP_002530280.1|/1.03495e-150/Aquaporin PIP2.1, putative [Ricinus communis]
7	CL307.Contig1_All	-0.663725	-0.964229	0.327566	1.20214	1.62307	1.27121	1.71866	-1.50195	-0.235647	0.379787	0.63649	0.78841	0.909393	0.884814	0.644955	0.265899	aquaporin PIP	-	gi|82659447|gb|ABB88840.1|/4.05892e-152/aquaporin [Stevia rebaudiana]
8	Unigene22097_All	-0.402984	-0.26194	0.149547	1.01149	1.76075	1.08033	0.867916	-1.61977	0.0871013	0.37921	0.558875	0.383545	0.853866	1.20913	0.600731	0.264565	aquaporin PIP	-	gi|121309843|dbj|BAF44223.1|/1.37023e-23/aquaporin [Iris x hollandica]
9	Unigene40982_All	0.0428501	-0.745519	0.489202	1.1229	0.973873	1.1594	1.0907	-1.84486	-0.534358	1.01903	0.678835	0.865255	1.21522	0.590657	0.590488	0.284254	aquaporin PIP	-	gi|170791079|gb|ACB38232.1|/5.47308e-157/aquaporin [Gerbera hybrid cultivar]
10	Unigene31149_All	-1.01701	-1.01316	0.221383	-0.607541	-0.0831954	0.0332172	-0.47233	-0.533084	-0.0947513	-0.707672	-0.545239	-0.404548	-0.344846	-0.551809	-0.419805	-0.454564	aquaporin PIP	-	gi|383479030|gb|AFH36337.1|/1.02973e-42/aquaporin PIP2;2 [Quercus petraea]
1	CL9780.Contig2_All	1.34275	0.712064	1.70851	3.35428	3.38507	2.89822	3.78678	-1.68566	-0.196967	0.597115	1.24972	1.85001	1.33547	2.63496	2.45538	0.826376	LRR receptor-like serine	[EC:2.7.11.1]	gi|198400321|gb|ACH87169.1|/4.04989e-117/MYB transcription factor [Camellia sinensis]
2	CL2471.Contig1_All	1.92771	1.39389	1.54982	2.51574	1.28037	2.1762	2.53029	-0.753834	-0.144046	2.38725	2.24442	1.84199	2.49562	1.77553	1.91057	1.4067	LRR receptor-like serine	[EC:2.7.11.1]	gi|337733638|gb|AEI72268.1|/8.65658e-118/leucine-rich repeat family protein [Citrus trifoliata]
3	Unigene17918_All	1.75	1.58451	0.889087	2.32239	1.58921	1.78514	2.10156	-2.70315	-0.578461	0.854344	1.32314	0.856249	1.27665	1.29669	1.71741	0.332208	LRR receptor-like serine	[EC:2.7.11.1]	gi|359480667|ref|XP_002272767.2|/0/PREDICTED: probable LRR receptor-like serine/threonine-protein kinase At5g63710-like [Vitis vinifera]
4	CL2471.Contig5_All	1.69644	1.4115	1.52732	2.16682	0.846724	1.3988	2.43286	-2.15751	0.253098	1.31373	1.4672	0.634229	0.885114	0.549728	1.64006	0.420798	LRR receptor-like serine	[EC:2.7.11.1]	gi|460406616|ref|XP_004248758.1|/2.37531e-130/PREDICTED: uncharacterized protein At4g06744-like [Solanum lycopersicum]
5	CL2471.Contig4_All	0.984298	1.90321	1.19394	1.69131	0.98914	1.41423	3.00542	-2.98944	-0.187087	1.06944	1.19747	0.252865	0.858435	-0.719898	1.59736	-0.0740308	LRR receptor-like serine	[EC:2.7.11.1]	gi|337733638|gb|AEI72268.1|/4.17349e-120/leucine-rich repeat family protein [Citrus trifoliata]
6	CL2941.Contig1_All	2.02082	1.95307	1.24908	1.73438	0.741213	1.02375	1.64051	-0.742246	-0.534836	0.597115	-0.258079	0.0906716	-0.0893389	-0.379591	1.4804	-0.188044	LRR receptor-like serine	[EC:2.7.11.1]	gi|224141953|ref|XP_002324325.1|/1.60041e-148/predicted protein [Populus trichocarpa]
7	CL6117.Contig2_All	0.0988263	0.0446398	0.275555	0.691314	1.46611	1.71015	0.839247	1.24325	0.849827	0.00101173	-0.557639	0.550103	0.536846	1.43332	0.732262	0.579533	LRR receptor-like serine	[EC:2.7.11.1]	gi|359806061|ref|NP_001240925.1|/1.94088e-155/DNA-damage-repair/toleration protein DRT100-like precursor [Glycine max]
8	CL2049.Contig1_All	-0.472824	-0.213389	0.203279	-1.42234	-0.460831	-1.15522	-1.34201	0.982418	0.42831	-0.965017	-1.20593	-0.699636	-0.546944	-0.442917	-0.694762	-0.349959	LRR receptor-like serine	[EC:2.7.11.1]	gi|359486510|ref|XP_002271317.2|/6.77743e-157/PREDICTED: probable LRR receptor-like serine/threonine-protein kinase At3g47570-like, partial [Vitis vinifera]
9	CL2803.Contig1_All	-0.202569	-0.633044	-1.18643	-1.51814	-0.892556	-0.454021	-2.01776	0.584492	0.162328	-0.892064	-1.39656	-0.412665	-0.272357	-0.636317	-0.98636	-0.409021	LRR receptor-like serine	[EC:2.7.11.1]	gi|359494335|ref|XP_002267870.2|/2.96154e-111/PREDICTED: probable LRR receptor-like serine/threonine-protein kinase At4g26540-like [Vitis vinifera]
10	Unigene27761_All	-1.21421	-1.06691	-0.184884	-1.54795	-1.26901	-1.35412	-1.41576	-0.797717	-0.623456	-0.73112	-1.30494	-1.26318	-1.29064	-1.13554	-1.15041	-1.02094	LRR receptor-like serine	[EC:2.7.11.1]	gi|359475350|ref|XP_002282482.2|/7.3322e-148/PREDICTED: uncharacterized protein At4g06744-like [Vitis vinifera]
11	CL2517.Contig6_All	-1.70853	-2.26522	-1.20987	-3.06357	-3.91414	-3.23107	-2.42754	0.792385	-1.00432	-1.21024	-4.94996	-3.01624	-0.549891	-1.37403	-2.5457	-1.61604	LRR receptor-like serine	[EC:2.7.11.1]	gi|359483612|ref|XP_002272319.2|/3.36116e-153/PREDICTED: LRR receptor-like serine/threonine-protein kinase FLS2-like [Vitis vinifera]
12	Unigene12382_All	-2.71614	-1.38747	-2.19838	-3.21558	-4.58072	-2.16068	-2.57954	-0.0482323	0.147681	-1.89474		-0.378814	0.502576	0.526433	-2.69121	-0.190849	LRR receptor-like serine	[EC:2.7.11.1]	gi|462409583|gb|EMJ14917.1|/2.02744e-58/hypothetical protein PRUPE_ppa000470mg [Prunus persica]
1	CL1827.Contig8_All	1.14112	0.995857	0.506881	2.1975	1.77224	1.57629	2.61114	-1.54626	-0.384926	0.0973996	0.556229	0.437474	-0.0437057	1.30665	1.543	0.0604091	myb proto-oncogene protein	-	gi|225435070|ref|XP_002284400.1|/1.78392e-57/PREDICTED: transcription factor MYB59-like [Vitis vinifera]
2	CL1827.Contig15_All	0.901242	0.159523	0.497011	1.9598	1.88911	1.76071	2.10313	-2.02446	-0.301303	0.403511	0.762051	0.438096	0.870727	1.45331	1.32436	0.228847	myb proto-oncogene protein	-	gi|470119695|ref|XP_004295946.1|/1.48526e-33/PREDICTED: transcription factor MYB59-like [Fragaria vesca subsp. vesca]
3	Unigene54463_All	0.506251	0.0490994	0.211908	1.72632	2.0692	2.15364	1.99271	-3.36066	-0.919579	0.0295036	-0.184271	0.190664	-0.492299	0.83495	1.24416	-0.557384	myb proto-oncogene protein	-	gi|449467898|ref|XP_004151659.1|/1.44624e-36/PREDICTED: transcription factor MYB59-like [Cucumis sativus]
4	CL1827.Contig2_All	0.19366	0.475025	0.512118	1.54416	1.91985	1.48842	2.1459	-1.66751	-0.263708	0.73959	0.928657	0.683728	1.00293	0.841037	1.18273	0.323531	myb proto-oncogene protein	-	gi|449467898|ref|XP_004151659.1|/4.92385e-37/PREDICTED: transcription factor MYB59-like [Cucumis sativus]
5	CL4452.Contig2_All	0.757789	-0.650506	-0.46141	1.87894	2.11045	1.27673	3.15742	-0.502798	-0.965848	-1.76434	0.777228	-0.418342	0.235637	0.856138	1.15277	-0.254618	myb proto-oncogene protein	-	gi|356575562|ref|XP_003555909.1|/1.2026e-51/PREDICTED: transcription factor MYB21-like [Glycine max]
6	CL1827.Contig10_All	0.29001	0.18155	0.141931	1.20465	1.54327	1.29089	1.47379	-1.84964	-0.637783	0.62311	0.500778	0.457211	0.454078	1.18122	0.875157	0.104139	myb proto-oncogene protein	-	gi|225435070|ref|XP_002284400.1|/2.64386e-73/PREDICTED: transcription factor MYB59-like [Vitis vinifera]
7	CL4452.Contig3_All	-0.809251	-0.480581	-2.29149	-2.57172	-0.558348	-3.10178	-0.213221	-0.310153	0.0341525	-0.0762857	-0.597167	-1.19595	0.606006	-0.513096	-1.43234	-0.293213	myb proto-oncogene protein	-	gi|356575562|ref|XP_003555909.1|/2.98525e-50/PREDICTED: transcription factor MYB21-like [Glycine max]

## Sheet: P77
DEGs directly involved in SVW resistance in Genotype-specific transcriptional pattern in P77(S Genotype)
Differentially expressed genes directly involved in SVW resistance in Genotype-specific transcriptional pattern P77(S Genotype) showing statistically significant differential expression. The relative expression values, calculated as the logarithm of fold changes (logFCs), in SVW inoculated SI8 and P77 plants at different time points are reported. The logarithm of fold changes (logFCs) derived fro…
NO.	GeneID	log2 Ratio(S6h/SCk)	log2 Ratio(S12h/SCk)	log2 Ratio(S24h/SCk)	log2 Ratio(S2d/SCk)	log2 Ratio(S3d/SCk)	log2 Ratio(S5d/SCk)	log2 Ratio(S10d/SCk)	log2 Ratio(P6h/PCk)	log2 Ratio(P12h/PCk)	log2 Ratio(P24h/PCk)	log2 Ratio(P2d/PCk)	log2 Ratio(P3d/PCk)	log2 Ratio(P5d/PCk)	log2 Ratio(P10d/PCk)	Average logFCs-S18	Average logFCs-P77	Seq. Description	Enzyme Codes	Blast nr
1	Unigene22107_All	0.472505	0.0908875	1.20712	0.957569	0.998556	0.67001	0.81733	-0.826646	0.222578	1.76377	1.8443	1.88491	1.8906	1.3614	0.744854	1.16299	peroxidase	[EC:1.11.1.7]	gi|225445501|ref|XP_002282138.1|/3.35055e-137/PREDICTED: peroxidase 25 [Vitis vinifera]
2	CL9538.Contig2_All	0.648855	0.252633	0.249083	2.5049	-0.718219	0.64042	0.604882	-0.773125	0.367647	2.21009	2.88888	1.64225	2.64393	1.63864	0.597508	1.5169	peroxidase	[EC:1.11.1.7]	gi|470102676|ref|XP_004287777.1|/9.11688e-60/PREDICTED: peroxidase 64-like [Fragaria vesca subsp. vesca]
3	Unigene488_All	0.939014	0.803439	1.31672	0.211548	0.686071	0.153834	-0.257615	-0.215617	0.791648	1.48147	0.662772	1.00791	1.0634	0.681582	0.55043	0.781881	peroxidase	[EC:1.11.1.7]	gi|460385830|ref|XP_004238604.1|/2.36726e-122/PREDICTED: peroxidase 10-like [Solanum lycopersicum]
4	CL1395.Contig3_All	0.481781	-0.302159	-0.342746	1.37436	0.759366	-0.0657011	1.62089	-2.59006	-1.07277	-1.07267	1.00327	0.111343	-0.468099	0.394261	0.503683	-0.527819	peroxidase	[EC:1.11.1.7]	gi|125620184|gb|ABN46984.1|/7.55229e-165/cationic peroxidase [Nelumbo nucifera]
5	Unigene22250_All	0.125793	-0.352891	-0.212051	0.744753	0.422683	0.15215	1.16421	-1.003	-1.39205	-0.0652377	-0.0193696	-0.0440778	0.167958	0.717641	0.292093	-0.23402	peroxidase	[EC:1.11.1.7]	gi|15227200|ref|NP_179828.1|/1.69121e-142/peroxidase [Arabidopsis thaliana]
6	CL1395.Contig1_All	-0.26359	0.131177	-0.120427	0.562626	0.0313683	0.472667	0.638762	-2.48008	-3.29624	-2.85626	-1.03816	1.32861	0.814069	-0.454202	0.207512	-1.14032	peroxidase	[EC:1.11.1.7]	gi|125620184|gb|ABN46984.1|/1.25866e-163/cationic peroxidase [Nelumbo nucifera]
7	Unigene12397_All	0.62418	-0.112673	0.98574	-0.10314	0.27552	-0.250635	-0.641319	-0.539247	0.571316	1.17884	1.04112	1.08288	0.672012	0.525699	0.111096	0.647518	peroxidase	[EC:1.11.1.7]	gi|369794151|gb|AEX20392.1|/3.98851e-88/putative class III peroxidase [Coffea arabica x Coffea canephora]
8	CL6791.Contig4_All	-0.662703	-0.372	-0.600616	0.380308	1.15114	0.627541	-0.985535	-1.96382	0.022772	0.902816	0.998937	1.50464	1.33942	0.529847	-0.0659811	0.476373	peroxidase	[EC:1.11.1.7]	gi|359492099|ref|XP_003634364.1|/4.06244e-97/PREDICTED: peroxidase 64-like isoform 2 [Vitis vinifera]
9	Unigene32711_All	-0.436858	-0.228482	-0.862509	0.4697	0.897062	0.463436	-1.56908	-2.22408	0.152404	0.966501	1.19345	1.51382	1.49219	0.615286	-0.180961	0.529938	peroxidase	[EC:1.11.1.7]	gi|225459726|ref|XP_002285892.1|/1.12642e-33/PREDICTED: peroxidase 64-like isoform 1 [Vitis vinifera]
10	CL9538.Contig1_All	-0.756784	-0.95536	0.136849	0.882845	-0.193496	0.887491	-1.39779	-2.95868	0.0445879	1.43957	1.89424	1.18106	1.55149	0.297808	-0.199464	0.492867	peroxidase	[EC:1.11.1.7]	gi|259414641|gb|ACW82412.1|/2.94028e-134/putative peroxidase [Olea europaea]
11	Unigene58449_All	-0.809251	-2.28794	-0.706523	0.391754	-0.0493341	1.44665	0.327348	-0.738774	-0.572006	-1.14566	-1.51764	-0.811339	-0.615075	-1.26364	-0.241041	-0.952019	peroxidase	[EC:1.11.1.7]	gi|7453855|gb|AAF63027.1|AF244924_1/7.35292e-49/peroxidase prx15 precursor [Spinacia oleracea]
12	Unigene2378_All	0.500364	0.184213	1.05153	-0.989273	-0.757295	-0.936816	-1.29581	2.52254	1.26186	1.166	-0.487851	-0.199108	-0.899898	-0.305045	-0.320441	0.43693	peroxidase	[EC:1.11.1.7]	gi|28629828|gb|AAO45182.1|/5.13355e-165/peroxidase 1 [Artemisia annua]
13	CL7371.Contig1_All	-0.797329	-0.946955	-0.466576	-1.31379	-0.540649	-0.75796	-1.67586	0.323083	0.108333	-0.569618	-1.47475	-0.724432	-1.057	-1.30772	-0.928445	-0.671729	peroxidase	[EC:1.11.1.7]	gi|224142233|ref|XP_002324463.1|/4.90068e-140/predicted protein [Populus trichocarpa]
1	CL2487.Contig1_All	2.22246	2.50561	2.19394	5.01324	3.62874	2.74621	7.58536	1.84158	1.11767	2.0457	3.96961	3.02558	1.75496	3.46688	3.69937	2.46028	L-ascorbate oxidase	[EC:1.10.3.3]	gi|225462759|ref|XP_002272618.1|/0/PREDICTED: laccase-14-like [Vitis vinifera]
2	CL7407.Contig1_All	0.221736	-0.508487	-0.033989	1.85323	2.27268	1.50839	2.31067	-3.02195	-1.61814	0.683064	1.82854	1.67722	1.49542	1.26054	1.08918	0.329243	L-ascorbate oxidase	[EC:1.10.3.3]	gi|359486369|ref|XP_002273875.2|/3.35571e-113/PREDICTED: laccase-12-like [Vitis vinifera]
3	Unigene46922_All	1.05325	1.52565	0.056438	0.968848	-0.325902	0.326311	0.675271	0.349103	0.281983	1.97292	1.44236	0.706578	1.63688	0.660734	0.611409	1.00722	L-ascorbate oxidase	[EC:1.10.3.3]	gi|460378341|ref|XP_004234931.1|/2.35948e-31/PREDICTED: monocopper oxidase-like protein SKS1-like [Solanum lycopersicum]
4	Unigene19560_All	-0.704316	-0.0229235	-0.128835	1.2743	1.67749	0.798682	1.10297	#VALUE!	-0.27734	0.892939	2.28019	2.39256	2.30637	1.98133	0.571052	#VALUE!	L-ascorbate oxidase	[EC:1.10.3.3]	gi|470143023|ref|XP_004307187.1|/4.86132e-53/PREDICTED: laccase-12-like [Fragaria vesca subsp. vesca]
5	CL11639.Contig2_All	0.120359	0.843309	1.17418	-0.531078	-0.0661423	1.1952	0.327348	-0.625956	-0.321179	-1.62663	-2.20489	-1.35864	-1.20423	-0.828899	0.437596	-1.1672	L-ascorbate oxidase	[EC:1.10.3.3]	gi|224113273|ref|XP_002332613.1|/4.64794e-35/predicted protein [Populus trichocarpa]
6	Unigene30619_All	0.697668	1.10734	0.366823	1.0615	-0.903871	0.138168	0.47345	0.255176	0.0275272	1.62012	1.24234	0.720722	1.42229	0.417782	0.420154	0.815136	L-ascorbate oxidase	[EC:1.10.3.3]	gi|460378341|ref|XP_004234931.1|/5.05518e-101/PREDICTED: monocopper oxidase-like protein SKS1-like [Solanum lycopersicum]
7	CL1219.Contig8_All	0.740716	0.712064	-0.504479	0.925779	-0.258787	0.132683	0.40981	-0.310153	0.541112	1.50868	1.07421	1.18652	1.72358	0.486904	0.308255	0.887264	L-ascorbate oxidase	[EC:1.10.3.3]	gi|218200491|gb|EEC82918.1|/2.06318e-43/hypothetical protein OsI_27845 [Oryza sativa Indica Group]
8	Unigene55217_All	0.334932	0.239577	-0.693584	0.896898	0.175615	0.366836	0.818334	-0.155147	0.553674	0.690224	2.0362	1.41126	1.65908	0.963838	0.305516	1.02273	L-ascorbate oxidase	[EC:1.10.3.3]	gi|356498932|ref|XP_003518300.1|/1.75942e-55/PREDICTED: laccase-4-like [Glycine max]
9	CL9898.Contig3_All	-0.99781	-0.865795	-1.46855	0.596653	1.10164	0.495	0.5028	-0.902893	-0.282057	-0.108431	1.37352	1.09685	1.09307	0.458368	-0.0908652	0.389775	L-ascorbate oxidase	[EC:1.10.3.3]	gi|460393811|ref|XP_004242502.1|/4.41016e-126/PREDICTED: laccase-3-like [Solanum lycopersicum]
10	CL9937.Contig4_All	0.0208238	0.712064	-1.29149	-1.30869	-0.0888624	0.576289	0.201817	3.31434	3.31761	1.27519	3.31683	4.20615	4.08754	1.69636	-0.168291	3.03057	L-ascorbate oxidase	[EC:1.10.3.3]	gi|224139028|ref|XP_002322962.1|/1.66447e-45/laccase 1b [Populus trichocarpa]
11	CL7407.Contig2_All	-0.487065	-0.936295	-1.73853	0.00180052	0.325334	-0.366856	0.00701538	-1.63162	-1.06374	-0.345213	0.747091	0.638584	0.614176	0.362714	-0.456371	-0.0968588	L-ascorbate oxidase	[EC:1.10.3.3]	gi|460390536|ref|XP_004240885.1|/0/PREDICTED: laccase-12-like [Solanum lycopersicum]
12	Unigene41171_All	-1.25481	-0.589105	-0.592655	-0.716771	-0.782349	0.528461	-1.02629	-1.07269	0.0374985	-1.35284	-2.32317	-0.523762	-2.09303	-1.97607	-0.63336	-1.32915	L-ascorbate oxidase	[EC:1.10.3.3]	gi|388494110|gb|AFK35121.1|/1.80473e-69/unknown [Medicago truncatula]
13	CL3277.Contig2_All	-1.58224	-0.744472	-0.37755	-1.33328	-0.770109	-0.0590102	-1.91828	-0.261095	-0.0847855	-1.68362	-1.78279	-0.568124	-0.650253	-0.78412	-0.969278	-0.830684	L-ascorbate oxidase	[EC:1.10.3.3]	gi|359496059|ref|XP_002268020.2|/0/PREDICTED: L-ascorbate oxidase homolog [Vitis vinifera]
14	Unigene2988_All	-1.16748	-0.863796	-0.0103035	-2.0889	-0.857512	-0.263967	-2.26372	0.227688	0.00690557	-1.36997	-2.17062	-0.788659	-0.985367	-1.10523	-1.07367	-0.883607	L-ascorbate oxidase	[EC:1.10.3.3]	gi|225447041|ref|XP_002269614.1|/0/PREDICTED: L-ascorbate oxidase homolog [Vitis vinifera]
1	Unigene28794_All	1.07145	0.289373	2.19884	4.1085	3.69762	3.77081	3.81971	-0.1621	-1.41936	3.01328	3.70132	3.67782	3.75642	2.94429	2.70804	2.21595	aquaporin PIP	-	gi|335954641|gb|AEH76327.1|/3.29637e-88/plasma membrane intrinsic protein 1 [Jatropha curcas]
2	CL307.Contig5_All	-0.301104	1.50561	-1.19838	1.69131	1.74121	1.57629	1.42046	-4.59255	-0.589284	-0.461779	0.079791	0.0541457	2.16933	1.93242	0.919344	-0.201132	aquaporin PIP	-	gi|82659447|gb|ABB88840.1|/2.32131e-150/aquaporin [Stevia rebaudiana]
1	CL2471.Contig3_All	0.995733	-0.0304393	0.835427	1.8557	0.42239	0.994433	2.00853	-2.24553	-1.86759	1.55777	1.2011	1.09208	1.46735	1.11561	1.01168	0.331541	LRR receptor-like serine	[EC:2.7.11.1]	gi|359475350|ref|XP_002282482.2|/1.38069e-145/PREDICTED: uncharacterized protein At4g06744-like [Vitis vinifera]
2	Unigene57038_All	0.279911	-0.280073	0.237209	1.2309	0.185515	0.815477	0.39661	-1.27062	0.587594	1.15535	1.3855	0.825545	1.46283	0.429135	0.409364	0.653618	LRR receptor-like serine	[EC:2.7.11.1]	gi|460408246|ref|XP_004249557.1|/4.44595e-140/PREDICTED: probable leucine-rich repeat receptor-like protein kinase At5g49770-like [Solanum lycopersicum]
3	CL6117.Contig1_All	-0.7046	-0.380041	-0.147151	-0.063139	0.559945	0.970757	-0.233483	-0.0507595	-0.131259	-1.2684	-1.02187	-0.217012	-0.0686435	-0.141512	0.000326855	-0.414207	LRR receptor-like serine	[EC:2.7.11.1]	gi|460410912|ref|XP_004250859.1|/6.53593e-124/PREDICTED: DNA-damage-repair/toleration protein DRT100-like [Solanum lycopersicum]
4	Unigene2582_All	-1.11815	-0.766509	0.0938049	-1.20458	-0.455645	0.625138	-0.563986	0.40852	-0.0989586	-1.04388	-1.17151	-0.710435	-0.572328	0.00447992	-0.484275	-0.454874	LRR receptor-like serine	[EC:2.7.11.1]	gi|88604736|gb|ABD46739.1|/1.19849e-89/leucine-rich repeat protein [Nicotiana tabacum]
5	Unigene27167_All	-0.788179	-0.989474	-0.54271	-0.559911	0.195244	0.624869	-1.35998	0.623739	-0.345081	-1.72066	-1.98148	-0.23829	-0.340026	-0.647917	-0.488591	-0.664245	LRR receptor-like serine	[EC:2.7.11.1]	gi|462395094|gb|EMJ00893.1|/2.58059e-88/hypothetical protein PRUPE_ppa000726mg [Prunus persica]
6	Unigene28755_All	-0.884019	-0.727468	-0.617061	-1.32333	-0.502282	0.531895	-0.694679	0.0520192	0.0791345	-1.04853	-1.34603	-0.85603	-0.678354	-0.935911	-0.602421	-0.676243	LRR receptor-like serine	[EC:2.7.11.1]	gi|88604736|gb|ABD46739.1|/2.97362e-59/leucine-rich repeat protein [Nicotiana tabacum]
7	Unigene20086_All	-0.82975	-0.827094	-0.340839	-0.813719	-0.404533	-0.215676	-1.57411	0.0301518	-0.124616	-1.15312	-1.21752	-0.443149	-0.670437	-0.841411	-0.715103	-0.631443	LRR receptor-like serine	[EC:2.7.11.1]	gi|359476840|ref|XP_003631896.1|/0/PREDICTED: probable LRR receptor-like serine/threonine-protein kinase At4g36180-like [Vitis vinifera]
8	Unigene15121_All	-1.095	-0.642428	-0.535742	-1.11814	-0.543402	-0.0929895	-1.00936	0.243719	-0.402106	-1.41457	-1.19882	-0.713432	-0.42791	-0.539369	-0.719581	-0.63607	LRR receptor-like serine	[EC:2.7.11.1]	gi|460380991|ref|XP_004236236.1|/0/PREDICTED: probable LRR receptor-like serine/threonine-protein kinase At4g26540-like [Solanum lycopersicum]
9	CL3991.Contig2_All	-0.522586	-0.5749	-0.809334	-1.37036	-0.775146	-0.458476	-2.17863	0.500829	-0.156899	-1.50021	-1.31836	-0.438192	-0.489688	-0.8783	-0.955632	-0.611545	LRR receptor-like serine	[EC:2.7.11.1]	gi|470117513|ref|XP_004294902.1|/0/PREDICTED: probable LRR receptor-like serine/threonine-protein kinase At4g26540-like [Fragaria vesca subsp. vesca]
10	Unigene28247_All	-0.91644	-0.457861	-0.908869	-1.63061	-0.663178	-0.121148	-2.22591	0.0419655	0.100376	-1.05452	-1.55248	-0.378814	-0.343096	-1.07021	-0.989145	-0.608111	LRR receptor-like serine	[EC:2.7.11.1]	gi|127058161|dbj|BAF48663.1|/1.16245e-38/leucine-rich repeat/extensin [Nicotiana plumbaginifolia]
1	Unigene3213_All	-0.100313	-0.377821	-0.0732485	1.09175	0.566438	0.73216	1.3905	-2.11565	-0.112381	-0.0118432	1.02567	0.88236	1.0151	1.12987	0.461352	0.259018	myb proto-oncogene protein	-	gi|196119871|gb|ACG69458.1|/0/MYB12 [Gerbera hybrid cultivar]

## Sheet: Figure
Genotype-specific transcriptional DEGs changes, encoded L-ascorbate oxidase, Aquaporin PIP, LRR or myb proto-oncogene protein in S18 or P77
The Genotype-specific transcriptional DEGs, encoded L-ascorbate oxidase, Aquaporin PIP, LRR or myb proto-oncogene protein in S18 or P77. Red line left part represent the variations of average fold changes in Genotype-specific transcriptional DEGs in S18, Red line right part represent that in P77.
L-ascorbate oxidase	NO.	Average FCs-S18	Average FCs-P77	Seq. Description
The DEGs in S18	1	-0.271451	0.229231	L-ascorbate oxidase
	2	-0.823458	0.628285	L-ascorbate oxidase
	3	-1.17458	-0.796881	L-ascorbate oxidase
	4	-1.47383	-0.815844	L-ascorbate oxidase
	5	-1.53047	-0.594061	L-ascorbate oxidase
	6	-1.57757	-0.240348	L-ascorbate oxidase
	7	-1.71225	-0.459428	L-ascorbate oxidase
The DEGs in P77	1	3.69937	2.46028	L-ascorbate oxidase
	2	1.08918	0.329243	L-ascorbate oxidase
	3	0.611409	1.00722	L-ascorbate oxidase
	4	0.571052	#VALUE!	L-ascorbate oxidase
	5	0.437596	-1.1672	L-ascorbate oxidase
	6	0.420154	0.815136	L-ascorbate oxidase
	7	0.308255	0.887264	L-ascorbate oxidase
	8	0.305516	1.02273	L-ascorbate oxidase
	9	-0.0908652	0.389775	L-ascorbate oxidase
	10	-0.168291	3.03057	L-ascorbate oxidase
	11	-0.456371	-0.0968588	L-ascorbate oxidase
	12	-0.63336	-1.32915	L-ascorbate oxidase
	13	-0.969278	-0.830684	L-ascorbate oxidase
	14	-1.07367	-0.883607	L-ascorbate oxidase
Aquaporin PIP	NO.	Average FCs-S18	Average FCs-P77	Seq. Description
The DEGs in S18	1	3.55705	2.29818	Aquaporin PIP
	2	1.71199	0.499535	aquaporin PIP
	3	1.21186	0.812303	aquaporin PIP
	4	1.04785	0.417633	aquaporin PIP
	5	0.957703	0.508678	aquaporin PIP
	6	0.846454	0.0456994	aquaporin PIP
	7	0.644955	0.265899	aquaporin PIP
	8	0.600731	0.264565	aquaporin PIP
	9	0.590488	0.284254	aquaporin PIP
	10	-0.419805	-0.454564	aquaporin PIP
The DEGs in P77	1	2.70804	2.21595	aquaporin PIP
	2	0.919344	-0.201132	aquaporin PIP
LRR	NO.	Average FCs-S18	Average FCs-P77	Seq. Description
The DEGs in S18	1	2.45538	0.826376	LRR receptor-like serine
	2	1.91057	1.4067	LRR receptor-like serine
	3	1.71741	0.332208	LRR receptor-like serine
	4	1.64006	0.420798	LRR receptor-like serine
	5	1.59736	-0.0740308	LRR receptor-like serine
	6	1.4804	-0.188044	LRR receptor-like serine
	7	0.732262	0.579533	LRR receptor-like serine
	8	-0.694762	-0.349959	LRR receptor-like serine
	9	-0.98636	-0.409021	LRR receptor-like serine
	10	-1.15041	-1.02094	LRR receptor-like serine
	11	-2.5457	-1.61604	LRR receptor-like serine
	12	-2.69121	-0.190849	LRR receptor-like serine
The DEGs in P77	1	1.01168	0.331541	LRR receptor-like serine
	2	0.409364	0.653618	LRR receptor-like serine
	3	0.000326855	-0.414207	LRR receptor-like serine
	4	-0.484275	-0.454874	LRR receptor-like serine
	5	-0.488591	-0.664245	LRR receptor-like serine
	6	-0.602421	-0.676243	LRR receptor-like serine
	7	-0.715103	-0.631443	LRR receptor-like serine
	8	-0.719581	-0.63607	LRR receptor-like serine
	9	-0.955632	-0.611545	LRR receptor-like serine
	10	-0.989145	-0.608111	LRR receptor-like serine
Myb proto- oncogene protein	NO.	Average FCs-S18	Average FCs-P77	Seq. Description
The DEGs in S18	1	1.543	0.0604091	myb proto-oncogene protein
	2	1.32436	0.228847	myb proto-oncogene protein
	3	1.24416	-0.557384	myb proto-oncogene protein
	4	1.18273	0.323531	myb proto-oncogene protein
	5	1.15277	-0.254618	myb proto-oncogene protein
	6	0.875157	0.104139	myb proto-oncogene protein
	7	-1.43234	-0.293213	myb proto-oncogene protein
The DEGs in P77	1	0.461352	0.259018	myb proto-oncogene protein
